# Supplementary material for: Characterizing Glomerular Barrier Dysfunction with Patient-Derived Serum in Glomerulus-on-a-Chip Models: Unveiling New Insights into Glomerulonephritis
Source: MDPI journal article supplement (doi:10.3390/ijms25105121), 2024-05-08
Supplement: s1 [file s1]

**Supplementary Table S1.** General characteristics and treatment modalities of the IgAN.

|                                           | IgAN1          | IgAN2   | IgAN3      | IgAN4      | IgAN5      |
|-------------------------------------------|----------------|---------|------------|------------|------------|
| Age (yr)                                  | 39             | 60      | 36         | 64         | 46         |
| Sex                                       | female         | female  | male       | female     | male       |
| SBP (mmHg)                                | 130            | 151     | 130        | 120        | 121        |
| DBP (mmHg)                                | 85             | 100     | 50         | 64         | 71         |
| WBC (10 <sup>3</sup> /uL)                 | 8600           | 8600    | 9610       | 6740       | 8830       |
| Hemoglobin (g/dL)                         | 12.4           | 8.5     | 14.4       | 12         | 10.6       |
| Platelet (10 <sup>3</sup> /uL)            | 244            | 131     | 247        | 301        | 181        |
| UPCR (mg/g)                               | 1827           | 4775.58 | 407.69     | 1084       | 637        |
| Serum creatinine (mg/dL)                  | 0.77           | 6.52    | 1.34       | 1.16       | 3.36       |
| eGFR-MDRD (mL/min/1.73m <sup>2</sup> )    | 88             | 6.6     | 62.6       | 48         | 20.1       |
| Pathology                                 |                |         |            |            |            |
| S.M.K. LEE classification                 | II             | V       | IV         | IV         | IV         |
| Oxford classification                     |                |         |            |            |            |
| Mesangial hypercellularity (M)            | 1              | 0       | 1          | 1          | 1          |
| Endocapillary hypercellularity (E)        | 0              | 0       | 0          | 0          | 0          |
| Segmental glomerulosclerosis (S)          | 0              | 1       | 1          | 1          | 1          |
| Tubular atrophy/interstitial fibrosis (T) | 1              | 2       | 1          | 1          | 1          |
| Cellular/ fibrocellular crescents (C)     | 0              | 0       | 0          | 0          | 0          |
| IF                                        |                |         |            |            |            |
| Mesangial deposits of IgA                 | 2+             | 2+      | 2+         | 3+         | 2+         |
| Podocyte FPE                              | focal moderate | diffuse | focal mild | focal mild | focal mild |

IgAN, Immunoglobulin A nephropathy; SBP, systolic blood pressure; DBP, diastolic blood pressure; WBC, white blood cell; UPCR, urine protein/creatinine ratio; eGFR-MDRD, estimated glomerular filtration rate-modification of diet in renal disease; WHO, world health organization; IF, immunofluorescence; IgA, immunoglobulin A; FPE, foot process effacement.

**Supplementary Table S2.** General characteristics and treatment modalities of the MN.

|                                        | MN1      | MN2      | MN3      | MN4     | MN5     |
|----------------------------------------|----------|----------|----------|---------|---------|
| Age (yr)                               | 40       | 62       | 55       | 82      | 80      |
| Sex                                    | female   | male     | female   | female  | male    |
| SBP (mmHg)                             | 134      | 135      | 136      | 111     | 138     |
| DBP (mmHg)                             | 77       | 86       | 89       | 68      | 80      |
| WBC (10 <sup>3</sup> /uL)              | 5.8      | 5.42     | 8.8      | 5.4     | 8.62    |
| Hemoglobin (g/dL)                      | 12.6     | 15.9     | 13.6     | 13      | 10.9    |
| Platelet (10 <sup>3</sup> /uL)         | 190      | 168      | 389      | 248     | 226     |
| UPCR (mg/g)                            | 10360.49 | 3312.62  | 9038.9   | 979.17  | 623.84  |
| Serum creatinine (mg/dL)               | 0.67     | 0.7      | 0.71     | 1.02    | 0.99    |
| eGFR-MDRD (mL/min/1.73m <sup>2</sup> ) | 91       | 117.1    | 87.9     | 52.8    | 73.9    |
| Anti-PLA2R antibody (RU/ml)            | N/A      | Negative | N/A      | N/A     | N/A     |
| Pathology                              |          |          |          |         |         |
| H&E staining                           |          |          |          |         |         |
| Capillary wall thickening              | diffuse  | diffuse  | diffuse  | diffuse | diffuse |
| IF                                     |          |          |          |         |         |
| Glomerulus peripheral deposits IgG     | 3+       | 3+       | 3+       | 2+      | 3+      |
| EM                                     |          |          |          |         |         |
| GBM thickening                         | diffuse  | diffuse  | diffuse  | diffuse | diffuse |
| Podocyte FPE                           | diffuse  | diffuse  | diffuse  | diffuse | diffuse |
| Subepithelial EDD                      | Large    | Large    | Moderate | Large   | Large   |

MN, membranous nephropathy; SBP, systolic blood pressure; DBP, diastolic blood pressure; WBC, white blood cell; UPCR, urine protein/creatinine ratio; eGFR-MDRD, estimated glomerular filtration rate-modification of diet in renal disease; RAS, renin-angiotensin system; MMF, mycophenolate mofetil; H&E, hematoxylin and eosin; IF, immunofluorescence; IgG, immunoglobulin G; EM, electron microscopy; GBM, glomerular basement membrane; FPE, foot process effacement; EDD, electron-dense deposits; N/A: not available.

**Supplementary Table S3.** General characteristics and treatment modalities of the MCD.

|                                        | MCD1    | MCD2    | MCD3         | MCD4     | MCD5         |
|----------------------------------------|---------|---------|--------------|----------|--------------|
| Age (yr)                               | 77      | 52      | 40           | 52       | 53           |
| Sex                                    | female  | female  | male         | male     | female       |
| SBP (mmHg)                             | 134     | 122     | 145          | 155      | 138          |
| DBP (mmHg)                             | 64      | 68      | 82           | 90       | 85           |
| WBC (10 <sup>3</sup> /uL)              | 6990    | 6110    | 9070         | 1740     | 8300         |
| Hemoglobin (g/dL)                      | 12.5    | 11.3    | 15           | 15       | 12.3         |
| Platelet (10 <sup>3</sup> /uL)         | 357     | 227     | 276          | 310      | 188          |
| UPCR (mg/g)                            | 14618   | 1666    | 1199.88      | 10768.86 | 990.97       |
| Serum creatinine (mg/dL)               | 0.66    | 0.47    | 0.95         | 0.93     | 0.78         |
| eGFR-MDRD (mL/min/1.73m <sup>2</sup> ) | 96.7    | 142.7   | 91.3         | 87.9     | 79.2         |
| Pathology                              |         |         |              |          |              |
| EM                                     |         |         |              |          |              |
| GBM thickening                         | normal  | normal  | normal       | normal   | normal       |
| Podocyte FPE                           | diffuse | diffuse | focal marked | diffuse  | focal marked |

MCD, minimal change disease; SBP, systolic blood pressure; DBP, diastolic blood pressure; WBC, white blood cell; UPCR, urine protein/creatinine ratio; eGFR-MDRD, estimated glomerular filtration rate-modification of diet in renal disease; RAS, renin-angiotensin system; EM, electron microscopy; GBM, glomerular basement membrane; FPE, foot process effacement.

**Supplementary Table S4.** General characteristics and treatment modalities of the LN.

|                                        | LN1            | LN2        | LN3            | LN4            | LN5            |
|----------------------------------------|----------------|------------|----------------|----------------|----------------|
| Age (yr)                               | 32             | 79         | 42             | 30             | 77             |
| Sex                                    | Female         | Female     | Female         | Female         | Female         |
| SBP (mmHg)                             | 113            | 151        | 143            | 137            | 129            |
| DBP (mmHg)                             | 62             | 81         | 77             | 84             | 70             |
| WBC (10 <sup>3</sup> /uL)              | 4800           | 6060       | 4300           | 3400           | 5860           |
| Hemoglobin (g/dL)                      | 12.1           | 10.8       | 10.9           | 8.4            | 10             |
| Platelet (10 <sup>3</sup> /uL)         | 191            | 188        | 412            | 251            | 122            |
| UPCR (mg/g)                            | 3485.95        | 998.84     | 2295.75        | 7546.79        | 1937.78        |
| Serum creatinine (mg/dL)               | 0.64           | 3.71       | 0.6            | 0.77           | 1.95           |
| eGFR-MDRD (mL/min/1.73m <sup>2</sup> ) | 115            | 12.1       | 114.4          | 94.6           | 25.4           |
| FANA                                   | +              | +          | +              | +              | +              |
| SLE                                    | -              | +          | +              | -              | +              |
| Anti-dsDNA antibody (IU/mL)            | 11.8           | 11.4       | 343            | 34             | 5.1            |
| C3 (mg/dL)                             | 111            | 63.1       | 88.4           | 63.9           | 41.3           |
| C4 (mg/dL)                             | 28.5           | 38.4       | 18.9           | 24.8           | 10.4           |
| Pathology                              |                |            |                |                |                |
| S.M.K. LEE classification              | V              | N/A        | IV             | V              | IV             |
| IF                                     | IgG/IgM/C3/C1q | No deposit | IgG/M/A/C3/C1q | IgG/M/A/C3/C1q | IgG/M/A/C3/C1q |
| EM                                     |                |            |                |                |                |
| GBM thickening                         | diffuse        | normal     | diffuse        | diffuse        | diffuse        |
| Podocyte FPE                           | diffuse        | focal mild | focal marked   | diffuse        | diffuse        |
| Subepithelial EDD                      | Large          | absent     | Large          | Large          | Small          |

LN, lupus nephritis; SBP, systolic blood pressure; DBP, diastolic blood pressure; WBC, white blood cell; UPCR, urine protein/creatinine ratio; eGFR-MDRD, estimated glomerular filtration rate-modification of diet in renal disease; FANA, fluorescent anti-nuclear antibody; SLE, systemic lupus erythematosus; Anti-dsDNA, anti-double stranded DNA; IgA, immunoglobulin A; IgG, immunoglobulin G; IgM, immunoglobulin M; C3, complement 3; C4, complement 4; C1q, complement 1q; IF, immunofluorescence; EM, electron microscopy; GBM, glomerular basement membrane; FPE, foot process effacement; EDD, electron-dense deposits; ; N/A: not available.
